# Supplementary material
Source: PubMed Central journal article supplement (PMC1895730)
Supplement: blood_2005-08-3340_1.pdf [file blood_2005-08-3340_1.pdf]

---



---

**Forward Subtraction CD44+25- Thymocytes**


---



---

| <b>Category</b>    | <b>Accession</b> | <b>Clone Name</b> | <b>Gene Name, descriptor</b>                      |
|--------------------|------------------|-------------------|---------------------------------------------------|
| apoptosis          | BC004594         | F3.17             | annexin                                           |
| apoptosis          | BC002085         | F3.16             | granzyme B                                        |
| cell adhesion      | NM_021293        | f1.81             | CD33                                              |
| cell adhesion      | BC004372         | F2.40             | CD44                                              |
| cell adhesion      | BC024376         | F3.41             | CD7                                               |
| cell adhesion      | NM_008399        | F1.06             | integrin alphaE1, M290                            |
| cell adhesion      | BC011184         | F3.96             | integrin beta 7                                   |
| cell adhesion      | AF065901         | F.19              | LFA-1                                             |
| cell adhesion      | BC092082         | F3.40             | Ly6C.2                                            |
| cell adhesion      | AF399831         | f3.107            | TIM3                                              |
| cell adhesion      | BC011159         | FA12              | VCAM-1                                            |
| cell cycle         | BC005534         | F1.66             | cyclin G                                          |
| channel            | BC086918         | F3.57             | RIC                                               |
| chaperone          | BC050927         | F3.139            | BiP                                               |
| chaperone          | BC010684         | F1.20             | CKAP1                                             |
| chemokine          | X70675           | f2.34             | merantes                                          |
| chemokine receptor | BC096491         | f2.59             | bonzo, strl33                                     |
| chemokine receptor | U51717           | F3.77             | CCR2                                              |
| chemokine receptor | AF019772         | FF1               | CCR5                                              |
| chemokine receptor | BC012653         | FA9               | CX3CR1                                            |
| chemokine receptor | XM_359011        | f2.55             | gpr15                                             |
| cytoskeleton       | BC021796         | F1.95             | actin                                             |
| cytoskeleton       | BC080806         | F3.133            | ARP3                                              |
| cytoskeleton       | BC040459         | F3.83             | desmoyokin                                        |
| cytoskeleton       | BC047366         | F2.126            | moesin                                            |
| cytoskeleton       | BC005459         | F1.56             | plastin-2                                         |
| cytoskeleton       | BC069847         | F1.24             | pleckstrin                                        |
| cytoskeleton       | BC083344         | F3.71             | tubulin                                           |
| cytoskeleton       | AK194967         | F3.95             | WDR1                                              |
| immunity           | various          | F3.97             | MHC class I                                       |
| matrix             | BC005679         | FE1               | ryudocan/syndecan 4                               |
| metabolism         | XM_619357        | F.08              | ALR, myeloid/lymphoid or mixed-lineage leukemia 2 |
| metabolism         | BC010773         | f2.07             | carbonic anhydrase                                |
| metabolism         | BC049623         | F1.67             | cytochrome C oxidase                              |
| metabolism         | BC024644         | FF11              | enolase, alpha                                    |

|            |           |        |                                                              |
|------------|-----------|--------|--------------------------------------------------------------|
| metabolism | BC007140  | f1.80  | fibulin                                                      |
| metabolism | BC086905  | f2.01  | L21 ribosomal protein                                        |
| metabolism | BC026856  | F3.85  | Napor-3, ETR-3                                               |
| metabolism | AK014016  | F1.68  | nuclear cap binding prot                                     |
| metabolism | BC090618  | f2.19  | S16 rp                                                       |
| metabolism | BC050828  | F3.86  | UDP glucose:ceramide glycosyl transferase                    |
| NK cell    | AF039025  | FB6    | CD94                                                         |
| NK cell    | BC056450  | F1.47  | DAP12                                                        |
| NK cell    | NM_016970 | F1.25  | MAFA                                                         |
| NK cell    | AF060982  | F1.03  | BY55                                                         |
| NK cell    | AJ223765  | F1.46  | NKp46                                                        |
| NK cell    | BC061168  | F3.13  | NKR-P1C                                                      |
| NK cell    | BC026937  | F.14   | PIRB5                                                        |
| NK cell    | BC011154  | F3.37  | SLAM7                                                        |
| NK cell    | AY557629  | fg7    | Trem13                                                       |
| protease   | BC067063  | FF7    | cathepsin C                                                  |
| receptor   | BC013807  | F3.119 | CD80                                                         |
| receptor   | NM_207244 | f3.74  | CD200r4                                                      |
| receptor   | BC006607  | f2.43  | CD34                                                         |
| receptor   | XM_132882 | F1.91  | CD69                                                         |
| receptor   | BC070474  | F1.12  | CD9                                                          |
| receptor   | BC089571  | FG8    | IL-7 receptor                                                |
| receptor   | AY424291  | f3.111 | Paqr2 (adiponectin receptor)                                 |
| secretory  | BC003832  | F3.36  | calcyclin                                                    |
| secretory  | BC006904  | FE2    | lactoferrin                                                  |
| signaling  | BC058686  | F3.27  | 14-3-3 epsilon                                               |
| signaling  | BC055377  | F1.36  | 70zpep                                                       |
| receptor   | BC052457  | f2.09  | ckit                                                         |
| signaling  | BC002072  | F1.97  | cystatin C                                                   |
| signaling  | BC052866  | f1.76  | FasL                                                         |
| signaling  | BC021845  | f2.23  | fgd2                                                         |
| signaling  | BC053381  | F3.19  | GDP-dissociation inhibitor                                   |
| signaling  | BC090258  | F1.52  | interferon induced transmembrane protein 1 (fragilis family) |
| signaling  | AK190089  | f2.46  | lim-1 kinase                                                 |
| signaling  | NM_175116 | FB5    | P2y5, purinergic receptor                                    |
| signaling  | BC038282  | F3.138 | PEA-15                                                       |
| signaling  | BC086793  | F1.90  | Rab7                                                         |

|               |           |        |                                          |
|---------------|-----------|--------|------------------------------------------|
| signaling     | BC064792  | f2.29  | rhoGAP cdc42                             |
| signaling     | AB075602  | f3.142 | Sts-1 (Cbl-1 interacting protein)        |
| signaling     | NM_019760 | f3.60  | Tde2/AIGP2                               |
| signaling     | AK020009  | F3.142 | UBASH3A                                  |
| signaling     | AY167974  | FG12   | very large interferon inducible GTPase-1 |
| tetraspanin   | BC021310  | F3.31  | CD53                                     |
| tetraspanin   | BC089543  | F1.50  | CD63                                     |
| transcription | BC051950  | FF5    | CArg box binding factor                  |
| transcription | NM_178854 | f3.63  | Cnot61                                   |
| transcription | U95004    | F3.102 | stra13                                   |
| transcription | BC017515  | f2.54  | TF2H 34 kd, TFb4                         |
| transcription | BC020042  | F3.28  | Zf9                                      |
| unknown       | BC043713  | fg6    | unknown                                  |
| unknown       | AK047064  | f3.102 | unknown                                  |

---

#### Reverse Subtraction, CD44-25+ Thymocytes

---

| Category     | Accession | Clone Name | Gene Name, descriptor                   |
|--------------|-----------|------------|-----------------------------------------|
| apoptosis    | NM_026360 | rh3        | DEAD box 47                             |
| cell cycle   | XM_485561 | R3.57      | APC5                                    |
| cell cycle   | BC022167  | R3.28      | Np95                                    |
| channel      | BC007125  | r1.85      | aquaporin                               |
| cytoskeleton | BC081453  | R2.23      | alpha prothymosin                       |
| cytoskeleton | BC005728  | R2.41      | MFAP1 microfibrillar associated protein |
| metabolism   | L30104    | R2.44      | alpha NAC                               |
| metabolism   | BC046616  | r2.4       | ATP synthase beta                       |
| metabolism   | BC083076  | R3.74      | cyclophilin                             |
| metabolism   | BC092276  | R2.74      | EF1-alpha                               |
| metabolism   | XM_484844 | R2.66      | EF1-gamma                               |
| metabolism   | BC023139  | R3.55      | elongation factor 1-beta                |
| metabolism   | BC011480  | R3.23      | fructose1,6, bisphosphatase             |
| metabolism   | BC055020  | R3.34      | glutathione transferase, theta class    |
| metabolism   | BC083067  | R2.29      | HMG-1                                   |
| metabolism   | BC083108  | R3.93      | HMG2                                    |
| metabolism   | BC088985  | r1.1       | HSP84                                   |
| metabolism   | BC046755  | R1.37      | LDH-2                                   |
| metabolism   | BC024364  | R1.39      | nadh dehydrogenase                      |
| metabolism   | AK076018  | R1.46      | p68 RNA helicase                        |

|               |           |         |                                             |
|---------------|-----------|---------|---------------------------------------------|
| metabolism    | NM_008917 | R2.61   | palmitoyl-protein thioesterase              |
| metabolism    | BC089305  | R2.42   | PSF, protein splicing factor                |
| metabolism    | various   | various | ribosomal proteins, various                 |
| metabolism    | BC018225  | R2.15   | SURF-5                                      |
| metabolism    | BC031723  | R3.8    | topoisomerase 3 beta                        |
| receptor      | K02891    | R3.100  | IL-2r alpha                                 |
| receptor      | AB025410  | R2.48   | Ten-m1/Odz                                  |
| signaling     | BC033422  | r1.93   | BST-1                                       |
| signaling     | BC064645  | R2.49   | casein kinase 1                             |
| signaling     | BC013444  | R1.82   | palmitoylated p55 Mpp-1                     |
| T cell        | BC062807  | R3.7    | CD3 delta                                   |
| T cell        | BC027528  | R3.10   | CD3 gamma                                   |
| T cell        | BC042741  | R2.5    | CTLA-4                                      |
| T cell        | BC031422  | R1.28   | Ku70                                        |
| T cell        | BC013337  | R3.102  | LAT                                         |
| T cell        | BC011474  | R27     | LCK                                         |
| T cell        | AY011883  | R1.34   | RAG-1                                       |
| T cell        | AK031014  | R2.35   | RAG-2                                       |
| T cell        | X04699    | RE6     | TCR gamma chain locus                       |
| T cell        | NM_009345 | R3.20   | (TdT) terminal deoxynucleotidyl transferase |
| transcription | AK010713  | R3.101  | BKLF/TEF2                                   |
| unknown       | XM_484476 | r36     | FYVE/PHD                                    |
